# Supplementary material for: Self-assembled molecules as selective contacts in CsPbBr3 nanocrystal light emitting diodes
Source: Royal Society of Chemistry journal article supplement (doi:10.1039/d2tc03536g), 2023-01-01
Supplement: d2tc03536g1.pdf [file d2tc03536g1.pdf]

## Supplementary Information

### Self-Assembled Molecules as Selective Contacts in CsPbBr<sub>3</sub> Nanocrystal Light Emitting Diodes

Sarika Kumari,<sup>a,b</sup> José G. Sánchez,<sup>a</sup> Muhammad Imran,<sup>c</sup> Ece Aktas,<sup>a,†</sup> Dora  
A. González,<sup>a,d</sup> Liberato Manna,<sup>c</sup> Eugenia Martínez-Ferrero,<sup>a,b,§,\*</sup> Emilio  
Palomares<sup>a,e</sup>

- a) Institute of Chemical Research of Catalonia-The Barcelona Institute of Science and Technology (ICIQ-BIST), Avda. Països Catalans, 16, Tarragona, E-43007, Spain
- b) Unit of Functional Printing & Embedded Devices, Centre Tecnològic de Catalunya EURECAT, Avda. Ernest Lluch 7, Mataró, E-08302, Spain.
- c) Nanochemistry Department, Istituto Italiano di Tecnologia (IIT), 16163 Genova, Italy.
- d) Departament d'Enginyeria Electrònica, Elèctrica i Automàtica. Universitat Rovira i Virgili, Avda. Països Catalans, 26, Tarragona, E-43007, Spain
- e) ICREA, Passeig Lluís Companys 23, Barcelona, E08010, Spain

§ Currently at ICIQ

† Present address: Department of Chemical, Materials and Production Engineering, University of Naples Federico II, Piazzale Tecchio 80, 80125 Fuorigrotta, Italy



**Figure S1.** a) TEM images of the CsPbBr<sub>3</sub> nanocrystals (NCs) prepared in solution, b) histogram showing the particle size distribution as measured by TEM, c) XRD pattern of the CsPbBr<sub>3</sub> NCs prepared in solution, and d) cyclic voltammogram of the MHP NCs measured in toluene and 0.1 M TBAPF<sub>6</sub> using ferrocene as internal reference (the corresponding signals are marked by \*).



**Figure S2.** UV-vis absorption (a) and fluorescence spectra (b) of the CsPbBr<sub>3</sub> NCs in toluene solution and the solution of Coumarine 153 used as reference. The excitation wavelength was 424 nm.



**Figure S3.** Tauc plot of the CsPbBr<sub>3</sub> NCs in toluene solution.



**Figure S4.** Photoluminescence decay with time of the CsPbBr<sub>3</sub> NCs in solution after excitation at 470 nm. The solid line represents the exponential fitted decay whose fitting parameters are indicated in the legend.



**Figure S5.** Current efficiency vs. applied bias for the PeLEDs prepared with different HTMs.

| Sample | Threshold<br>15 nm                                                                  | Threshold<br>25 nm                                                                  | Threshold<br>40 nm                                                                 | Threshold<br>50 nm                                                                  |
|--------|-------------------------------------------------------------------------------------|-------------------------------------------------------------------------------------|------------------------------------------------------------------------------------|-------------------------------------------------------------------------------------|
| BLANK  |    |    |  |  |
| PTAA   |    |    | -----                                                                              | -----                                                                               |
| EADR03 |   |   | -----                                                                              | -----                                                                               |
| EADR04 |  |  | -----                                                                              | -----                                                                               |

**Figure S6.** Threshold image analysis of the AFM images of the films of ITO/HTM/CsPbBr<sub>3</sub> NCs where HTM is blank, PTAA, **EADR03**, and **EADR04**. The red colour correspond to the masked regions whose heigh is higher than the threshold value indicated at the top of each column.



**Figure S7.** Optical characterization of the films made of ITO/HTMs/CsPbBr<sub>3</sub> NCs: (a) UV-VIS absorption spectra, (b) Steady-state fluorescence spectra of the samples covered with PMMA, and (c) Fluorescence time decay of the samples measured after excitation at 470 nm.



**Figure S8.** Steady-state fluorescence spectra of the solutions of MHP NCs, MHP NCs mixed with PTAA and MHP NCs mixed with **EADR04**.

## REFERENCES

(1) Aktas, E.; Phung, N.; Köbler, H.; González, D. A.; Méndez, M.; Kafedjiska, I.; Turren-Cruz, S. H.; Wenisch, R.; Lauermann, I.; Abate, A.; Palomares, E. Understanding the Perovskite/Self-Assembled Selective Contact Interface for Ultra-Stable and Highly Efficient p-i-n Perovskite Solar Cells. *Energy Environ. Sci.* **2021**, *14* (7), 3976–3985. <https://doi.org/10.1039/d0ee03807e>.
